# Supplementary material
Source: ML conference proceedings conference paper supplement (https://proceedings.mlr.press/v163/adila22a.html)
Supplement: Supplementary file [file adila22a-supp.pdf]

## A Appendix

### A.1 Supplementary plot: OOD vs in-distribution on training dynamics information (Training and in-dis: RTE; OOD: WNLI)

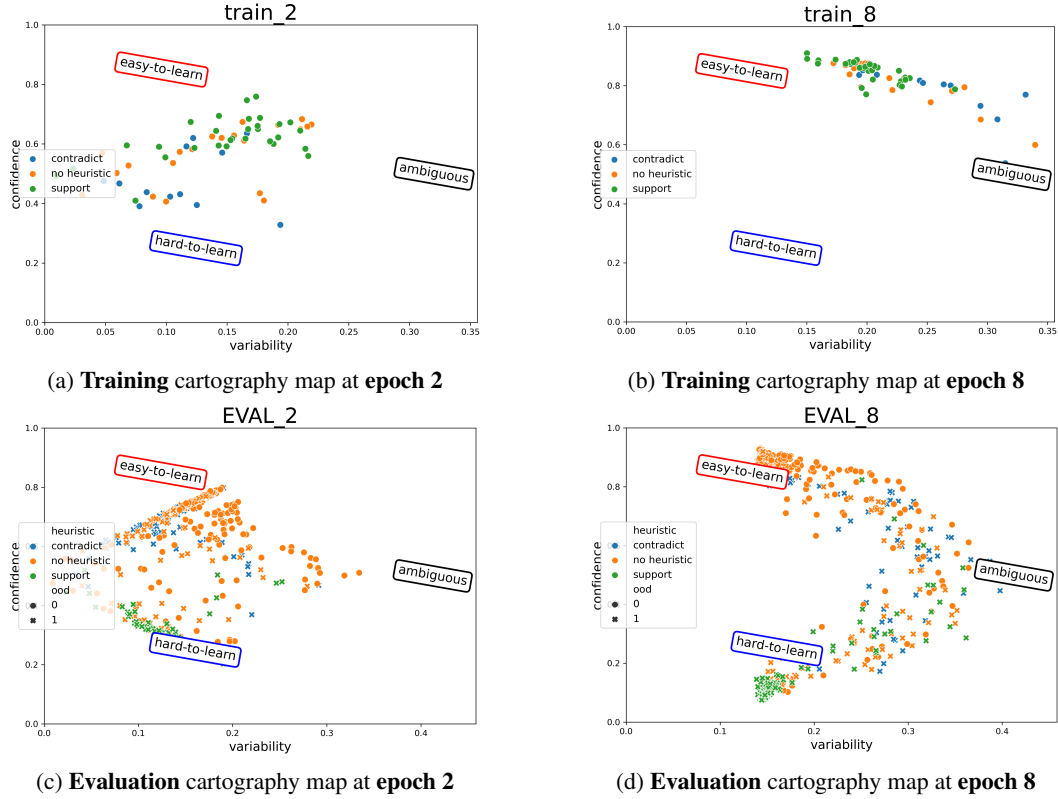

Figure 3: Training cartography maps (training set: RTE). The number of heuristic related samples in RTE is small.

### A.2 Supplementary plot: OOD vs in-distribution on syntactic characteristics (entailment)

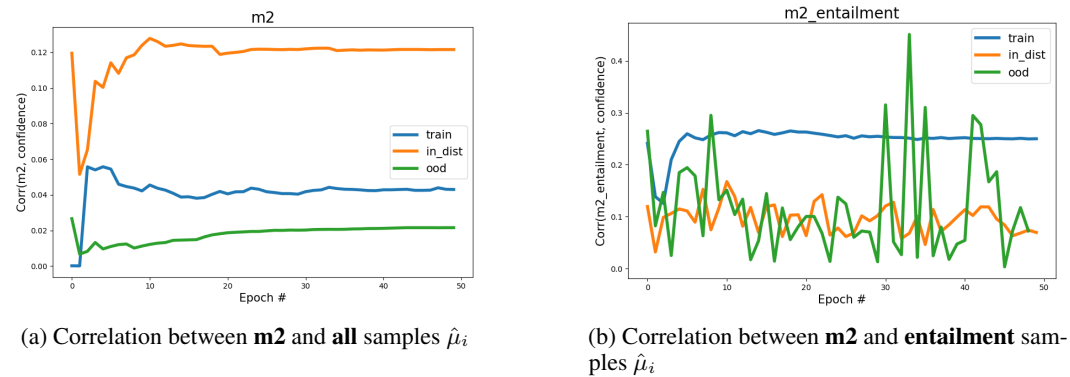

Figure 4: Results for hypothesis 2.2. Training and in-distribution test samples are RTE, and OOD samples are WNLI.

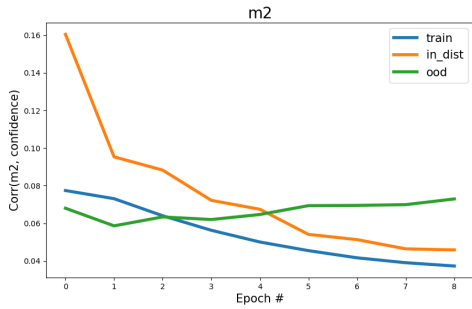

(a) Correlation between **m2** and **all** samples  $\hat{\mu}_i$

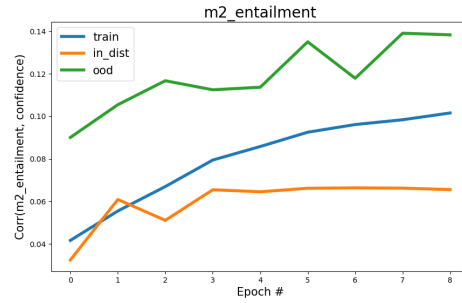

(b) Correlation between **m2** and **entailment** samples  $\hat{\mu}_i$

Figure 5: Results for hypothesis 2.2. Training and in-distribution test samples are MNLI, and OOD samples are RTE.

Results presented are at the end of epoch 8 for MNLI training and the end of epoch 50 for RTE training. This is based on the epoch in which the training error has converged (around 0.02).

### A.3 Supplementary plot: OOD vs in-distribution on training dynamics information (Training and in-dis: MNLI; OOD: RTE)

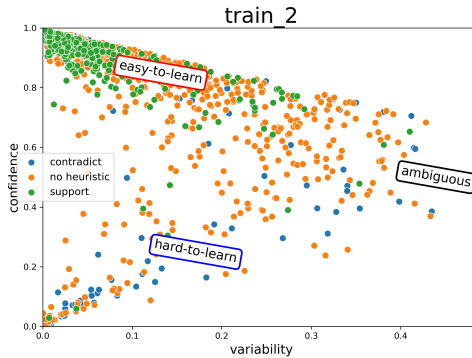

(a) Training cartography map at epoch 2

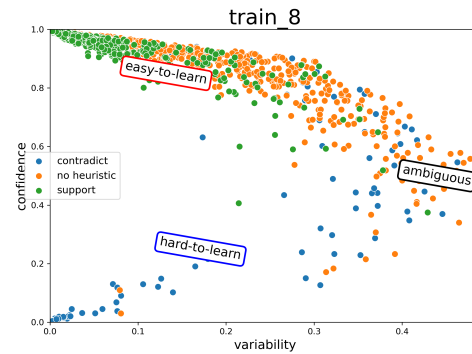

(b) Training cartography map at epoch 8

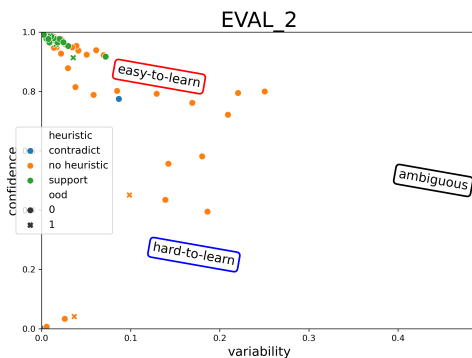

(c) Evaluation cartography map at epoch 2

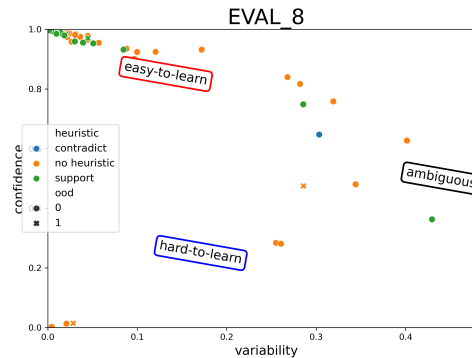

(d) Evaluation cartography map at epoch 8

Figure 6: Training and evaluation cartography maps (train: MNLI, evaluation: RTE). The number of heuristics related samples in RTE is small.

#### A.4 Supplementary plot: OOD vs in-distribution on syntactic characteristics (non-entailment)

This section shows plots for correlation between confidence scores ( $\hat{\mu}_i$ ) of **non entailment** samples and m2

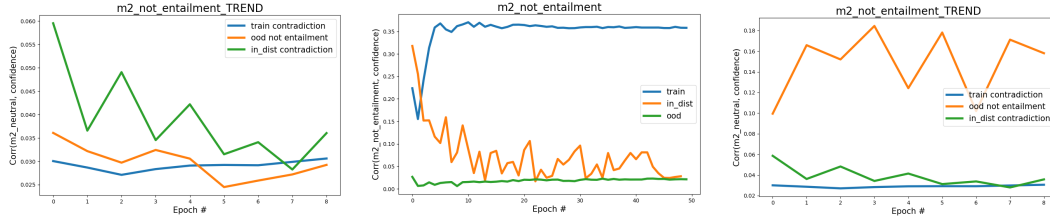

(a) Train & in-distribution: MNLi, OOD: WNLI (b) Train & in-distribution: RTE, OOD: WNLI (c) Train & in-distribution: MNLi, OOD: RTE

Figure 7: Supplementary results for 3.2. Correlation between  $\hat{\mu}_i$  of **non-entailment** samples and m2

#### A.5 Supplementary material: Extra lexical overlap measure

We also added another measure to quantify tendency to adopt lexical overlap heuristic. We calculated  $m1 = \frac{|s1 \cap s2|}{|s1|}$ . Essentially, this measures how much percentage of words found in the premise ( $s1$ ) can also be found in the hypothesis ( $s2$ ).

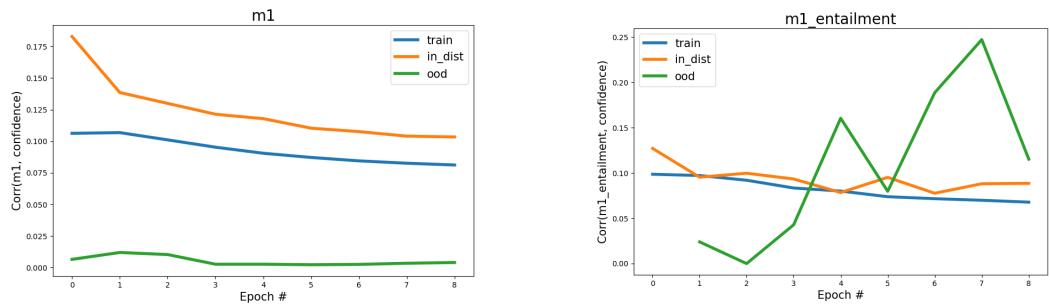

(a) Correlation between **m2** and **all** samples  $\hat{\mu}_i$  (b) Correlation between **m2** and **entailment** samples  $\hat{\mu}_i$

Figure 8: Results for hypothesis 2.2. Training and in-distribution test samples are MNLi, and OOD samples are WNLI.

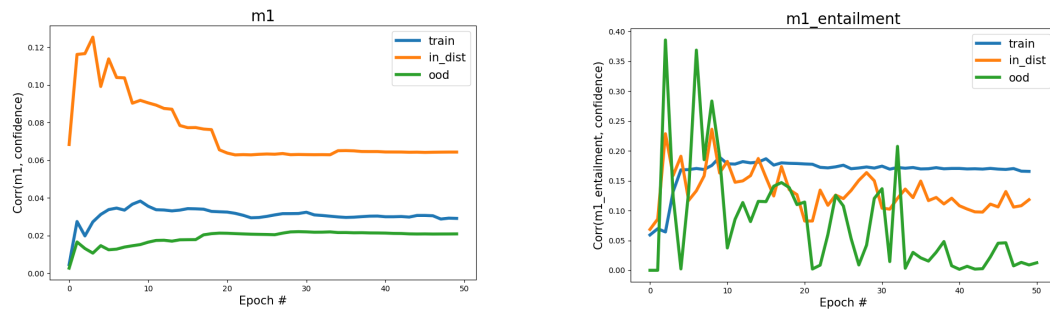

(a) Correlation between **m2** and **all** samples  $\hat{\mu}_i$  (b) Correlation between **m2** and **entailment** samples  $\hat{\mu}_i$

Figure 9: Results for hypothesis 2.2. Training and in-distribution test samples are RTE, and OOD samples are WNLI.

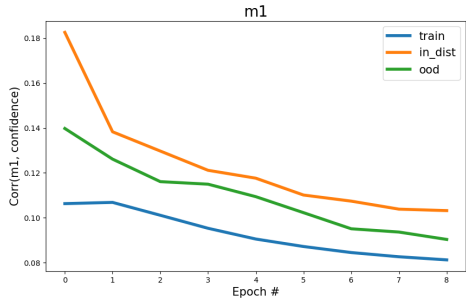

(a) Correlation between **m2** and **all** samples  $\hat{\mu}_i$

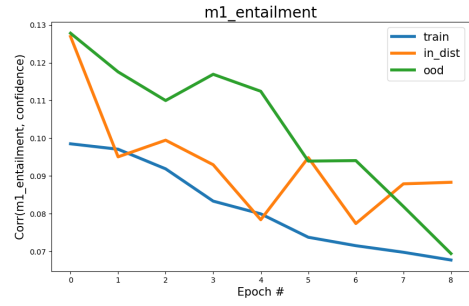

(b) Correlation between **m2** and **entailment** samples  $\hat{\mu}_i$

Figure 10: Results for hypothesis 2.2. Training and in-distribution test samples are MNLI, and OOD samples are RTE.
